# Supplementary material for: Phytochemical characterization, and antioxidant and antimicrobial activities of white cabbage extract on the quality and shelf life of raw beef during refrigerated storage
Source: Royal Society of Chemistry journal article supplement (doi:10.1039/d0ra06727j), 2020-01-01

Supporting Information S2. GC-MS chromatogram of WCC extract

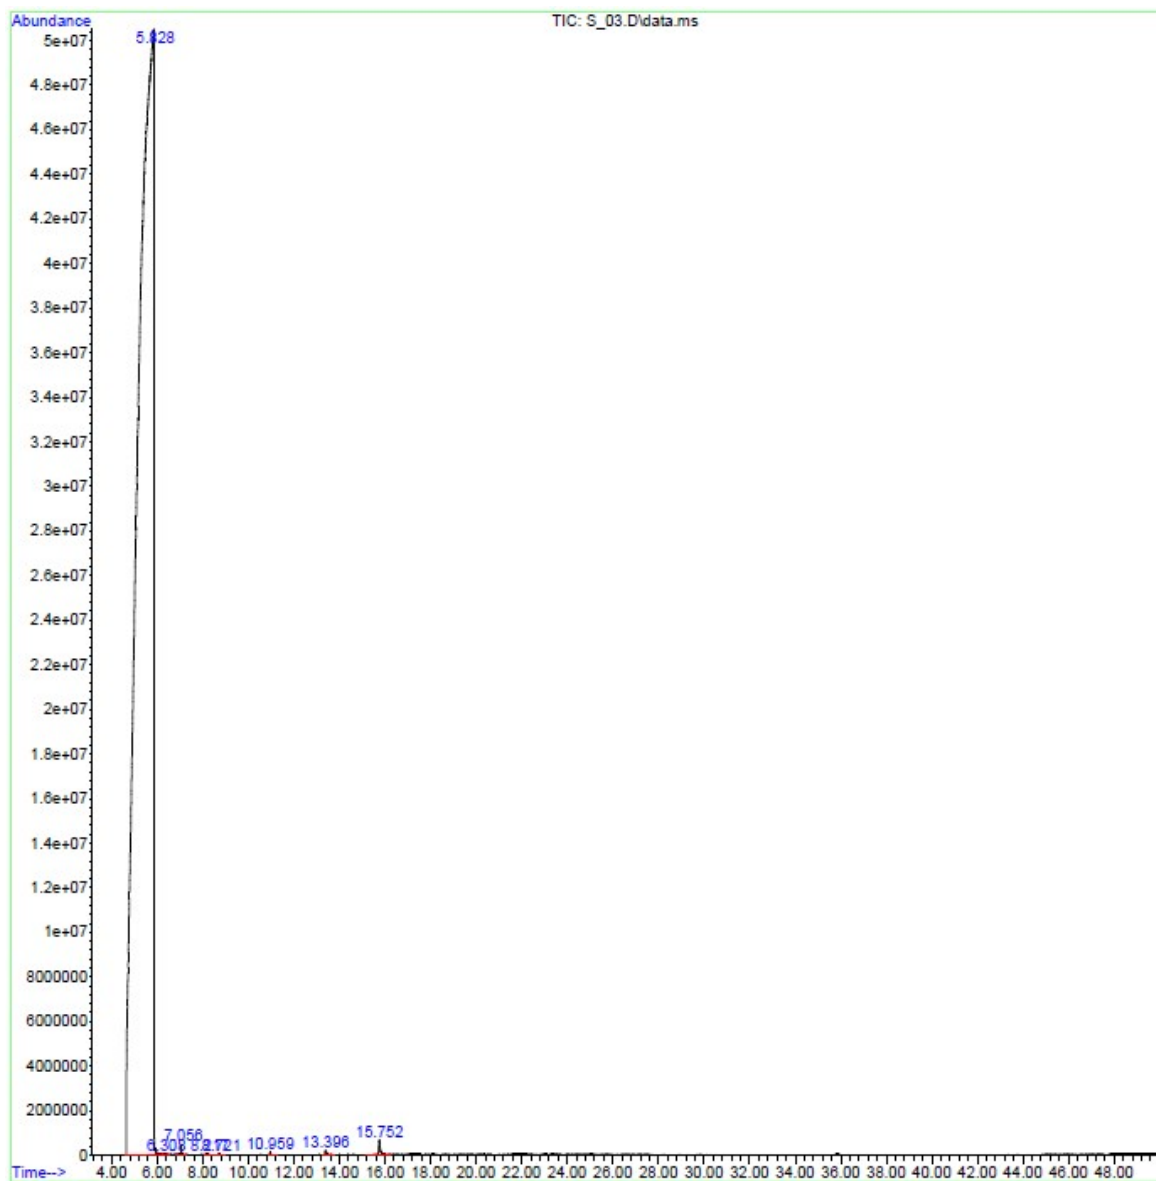

| Peak | R.T time | Area     |
|------|----------|----------|
| 1    | 8.722    | 1713374  |
| 2    | 10.958   | 3799225  |
| 3    | 13.397   | 10526946 |
| 4    | 15.752   | 34830707 |

Library report - C:\Database\W8N05ST.L

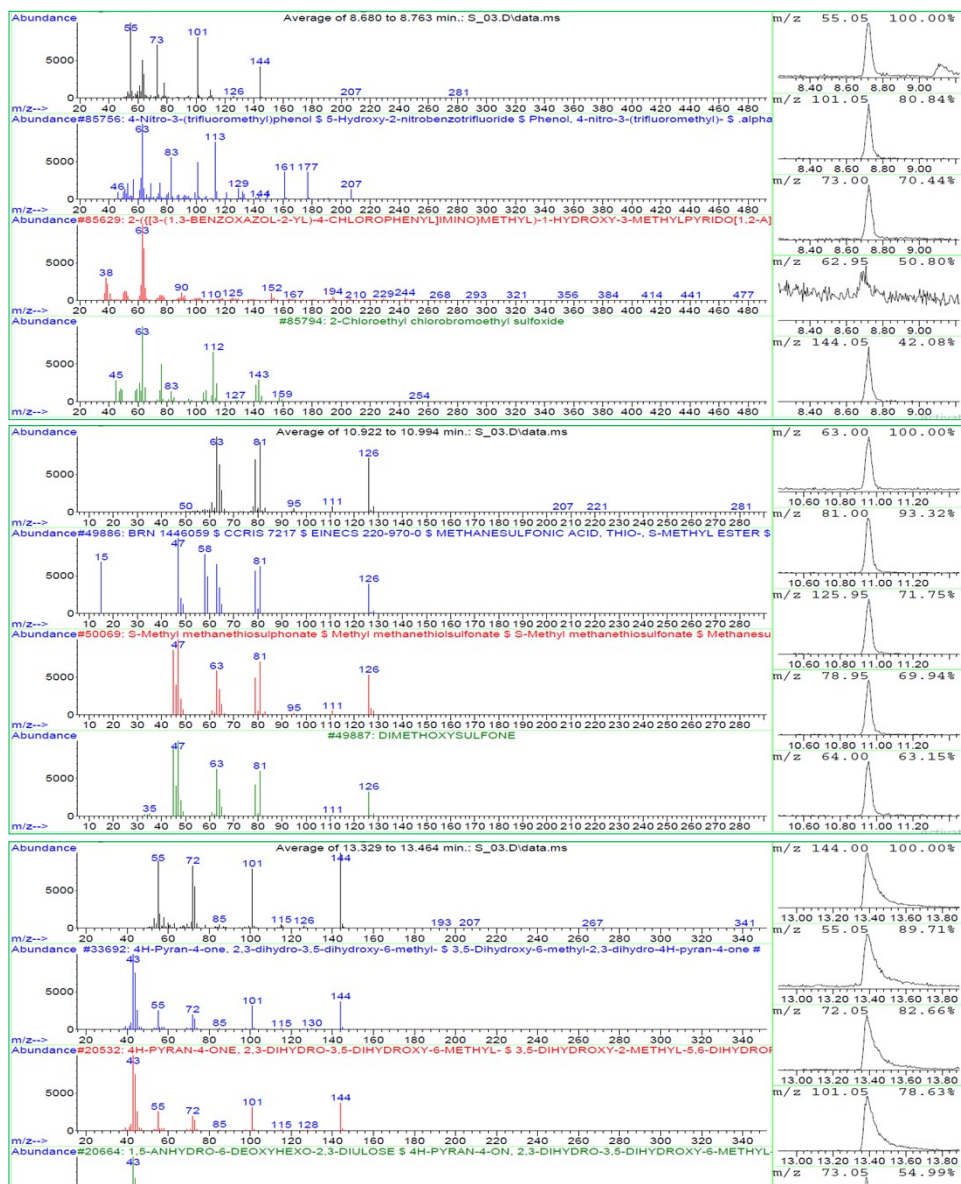

| List of microorganisms        | Zone of inhibition (mm)            |                           |                           |                           |                         |                         |                         |                         |
|-------------------------------|------------------------------------|---------------------------|---------------------------|---------------------------|-------------------------|-------------------------|-------------------------|-------------------------|
|                               | 4-Nitro-3-(trifluoromethyl) phenol |                           | Methanesulfonic acid      |                           | 4H-Pyran-4-one          |                         | 2-Furancarboxaldehyde   |                         |
|                               | 0.5 mg mL <sup>-1</sup>            | 1.0 mg mL <sup>-1</sup>   | 0.5 mg mL <sup>-1</sup>   | 1.0 mg mL <sup>-1</sup>   | 0.5 mg mL <sup>-1</sup> | 1.0 mg mL <sup>-1</sup> | 0.5 mg mL <sup>-1</sup> | 1.0 mg mL <sup>-1</sup> |
| <b>Gram-negative bacteria</b> |                                    |                           |                           |                           |                         |                         |                         |                         |
| ATCC 14028                    | 09.00 ± 0.03 <sup>b</sup>          | 15.00 ± 0.01 <sup>a</sup> | 09.00 ± 0.03 <sup>b</sup> | 11.00 ± 0.05 <sup>a</sup> | -                       | -                       | -                       | -                       |
| ATCC 35150                    | 10.00 ± 0.02 <sup>b</sup>          | 15.00 ± 0.04 <sup>b</sup> | -                         | -                         | -                       | -                       | -                       | -                       |
| ATCC 43894                    | 11.00 ± 0.03 <sup>b</sup>          | 20.00 ± 0.05 <sup>b</sup> | -                         | -                         | -                       | -                       | -                       | -                       |
| <b>Gram-positive bacteria</b> |                                    |                           |                           |                           |                         |                         |                         |                         |
| ATCC 13150                    | 11.00 ± 0.01 <sup>a</sup>          | 15.00 ± 0.05 <sup>a</sup> | -                         | -                         | -                       | -                       | -                       | -                       |
| ATCC 12600                    | 10.00 ± 0.04 <sup>a</sup>          | 17.00 ± 0.03 <sup>a</sup> | 11.00 ± 0.01 <sup>a</sup> | 11.00 ± 0.04 <sup>a</sup> | -                       | -                       | -                       | -                       |
| ATCC 19118                    | 10.00 ± 0.02 <sup>a</sup>          | 19.00 ± 0.03 <sup>b</sup> | 10.00 ± 0.04 <sup>a</sup> | 10.00 ± 0.03 <sup>a</sup> | -                       | -                       | -                       | -                       |
| ATCC 14579                    | 10.00 ± 0.05 <sup>a</sup>          | 20.00 ± 0.05 <sup>a</sup> | -                         | -                         | -                       | -                       | -                       | -                       |
| <b>Fungi</b>                  |                                    |                           |                           |                           |                         |                         |                         |                         |
| KCTC 7965                     | 11.00 ± 0.01 <sup>a</sup>          | 11.00 ± 0.05 <sup>a</sup> | -                         | -                         | -                       | -                       | -                       | -                       |
| KCTC 6145                     | 10.00 ± 0.04 <sup>a</sup>          | 13.00 ± 0.05 <sup>a</sup> | -                         | -                         | -                       | -                       | -                       | -                       |
| KCTC 6143                     | 10.00 ± 0.04 <sup>a</sup>          | 13.00 ± 0.03 <sup>a</sup> | -                         | -                         | -                       | -                       | -                       | -                       |
| KCTC 6317                     | 10.00 ± 0.03 <sup>a</sup>          | 11.00 ± 0.05 <sup>a</sup> | -                         | -                         | -                       | -                       | -                       | -                       |

**Supporting Information 2:** Antimicrobial activity of the compounds present in WC

| List of microorganisms        | Zone of inhibition (mm)            |                           |                           |                           |                         |                         |                         |                         |
|-------------------------------|------------------------------------|---------------------------|---------------------------|---------------------------|-------------------------|-------------------------|-------------------------|-------------------------|
|                               | 4-Nitro-3-(trifluoromethyl) phenol |                           | Methanesulfonic acid      |                           | 4H-Pyran-4-one          |                         | 2-Furancarboxaldehyde   |                         |
|                               | 0.5 mg mL <sup>-1</sup>            | 1.0 mg mL <sup>-1</sup>   | 0.5 mg mL <sup>-1</sup>   | 1.0 mg mL <sup>-1</sup>   | 0.5 mg mL <sup>-1</sup> | 1.0 mg mL <sup>-1</sup> | 0.5 mg mL <sup>-1</sup> | 1.0 mg mL <sup>-1</sup> |
| <b>Gram-negative bacteria</b> |                                    |                           |                           |                           |                         |                         |                         |                         |
| ATCC 14028                    | 09.00 ± 0.03 <sup>b</sup>          | 15.00 ± 0.01 <sup>a</sup> | 09.00 ± 0.03 <sup>b</sup> | 11.00 ± 0.05 <sup>a</sup> | -                       | -                       | -                       | -                       |
| ATCC 35150                    | 10.00 ± 0.02 <sup>b</sup>          | 15.00 ± 0.04 <sup>b</sup> | -                         | -                         | -                       | -                       | -                       | -                       |
| ATCC 43894                    | 11.00 ± 0.03 <sup>b</sup>          | 20.00 ± 0.05 <sup>b</sup> | -                         | -                         | -                       | -                       | -                       | -                       |
| <b>Gram-positive bacteria</b> |                                    |                           |                           |                           |                         |                         |                         |                         |
| ATCC 13150                    | 11.00 ± 0.01 <sup>a</sup>          | 15.00 ± 0.05 <sup>a</sup> | -                         | -                         | -                       | -                       | -                       | -                       |
| ATCC 12600                    | 10.00 ± 0.04 <sup>a</sup>          | 17.00 ± 0.03 <sup>a</sup> | 11.00 ± 0.01 <sup>a</sup> | 11.00 ± 0.04 <sup>a</sup> | -                       | -                       | -                       | -                       |
| ATCC 19118                    | 10.00 ± 0.02 <sup>a</sup>          | 19.00 ± 0.03 <sup>b</sup> | 10.00 ± 0.04 <sup>a</sup> | 10.00 ± 0.03 <sup>a</sup> | -                       | -                       | -                       | -                       |
| ATCC 14579                    | 10.00 ± 0.05 <sup>a</sup>          | 20.00 ± 0.05 <sup>a</sup> | -                         | -                         | -                       | -                       | -                       | -                       |
| <b>Fungi</b>                  |                                    |                           |                           |                           |                         |                         |                         |                         |
| KCTC 7965                     | 11.00 ± 0.01 <sup>a</sup>          | 11.00 ± 0.05 <sup>a</sup> | -                         | -                         | -                       | -                       | -                       | -                       |
| KCTC 6145                     | 10.00 ± 0.04 <sup>a</sup>          | 13.00 ± 0.05 <sup>a</sup> | -                         | -                         | -                       | -                       | -                       | -                       |
| KCTC 6143                     | 10.00 ± 0.04 <sup>a</sup>          | 13.00 ± 0.03 <sup>a</sup> | -                         | -                         | -                       | -                       | -                       | -                       |
| KCTC 6317                     | 10.00 ± 0.03 <sup>a</sup>          | 11.00 ± 0.05 <sup>a</sup> | -                         | -                         | -                       | -                       | -                       | -                       |

### Supporting Information 3: Antimicrobial activity of the compounds present in WC

### Supporting Information S3.

Chemical composition of the WC extracts using different solvents

| Name of the compound                              | Chemical formula                                               | Molecular weight (Da) | Area (%) | Retention time |
|---------------------------------------------------|----------------------------------------------------------------|-----------------------|----------|----------------|
| <b>Ethanol</b>                                    |                                                                |                       |          |                |
| Acetic formic anhydride                           | C <sub>3</sub> H <sub>4</sub> O <sub>3</sub>                   | 88.062                | 0.09     | 3.605          |
| Diethyl hexanedioate                              | C <sub>10</sub> H <sub>18</sub> O <sub>4</sub>                 | 202.247               | 0.13     | 4.092          |
| 2-Methyltetrahydro-3-furanone                     | C <sub>5</sub> H <sub>8</sub> O <sub>2</sub>                   | 100.116               | 0.13     | 4.542          |
| N-Methyl-D-aspartic acid                          | C <sub>5</sub> H <sub>9</sub> NO <sub>4</sub>                  | 147.129               | 0.09     | 7.524          |
| Ethyl cyclopropane                                | C <sub>5</sub> H <sub>10</sub>                                 | 70.133                | 0.18     | 7.846          |
| Acetamide, N-(2-aminoethyl-)                      | C <sub>4</sub> H <sub>10</sub> N <sub>2</sub> O                | 102.135               | 0.10     | 9.124          |
| 1(2H)-pentalenone, hexahydro-4-methyl-5-methylene | C <sub>10</sub> H <sub>10</sub> O                              | 150.218               | 0.16     | 10.432         |
| Cyclopentasiloxane, decamethyl                    | C <sub>10</sub> H <sub>30</sub> O <sub>5</sub> Si <sub>5</sub> | 370.770               | 0.06     | 13.422         |

|                                                                         |                                                                 |         |      |        |
|-------------------------------------------------------------------------|-----------------------------------------------------------------|---------|------|--------|
| 4H-pyran-4-one, 2, 3-dihydro-3,5-dihydroxy-6-methyl                     | C <sub>6</sub> H <sub>8</sub> O <sub>4</sub>                    | 144.125 | 0.13 | 14.507 |
| 5-methoxy-2,2-dimethyl-1-indanone                                       | C <sub>12</sub> H <sub>14</sub> O <sub>2</sub>                  | 190.238 | 0.05 | 16.737 |
| Acetic acid, [bis[(trimethylsilyloxy)phosphoryl]-, trimethylsilyl ester | C <sub>11</sub> H <sub>29</sub> O <sub>5</sub> PSi <sub>3</sub> | 356.575 | 0.05 | 18.091 |
| 1-Propanamine, N,2-dimethyl-N-nitroso-                                  | C <sub>5</sub> H <sub>12</sub> N <sub>2</sub> O                 | 116.162 | 0.12 | 20.895 |
| Propanethioic acid, o-(trimethylsilyl) ester                            | C <sub>8</sub> H <sub>18</sub> OSSi                             | 190.378 | 0.05 | 22.323 |
| 2-deoxy-alpha-d-ribose                                                  | C <sub>5</sub> H <sub>10</sub> O <sub>4</sub>                   | 134.130 | 0.30 | 22.915 |
| Phenol, 2,4-bis(1,1-dimethylethyl)-                                     | C <sub>14</sub> H <sub>22</sub> O                               | 206.324 | 0.06 | 23.52  |
| 1,2,5-Oxadiazole-3-carboxamide, 4-amino-N-(2-aminoethyl)                | C <sub>5</sub> H <sub>9</sub> N <sub>5</sub> O <sub>2</sub>     | 171.157 | 0.10 | 24.905 |
| 3-Pyridinecarbonitrile, 1,4-dihydro-1-methyl-4-oxo-                     | C <sub>7</sub> H <sub>6</sub> N <sub>2</sub> O                  | 134.135 | 0.11 | 25.636 |
| 2-Aminopteridine-4,7-diol                                               | C <sub>6</sub> H <sub>5</sub> N <sub>5</sub> O <sub>2</sub>     | 179.136 | 0.09 | 25.811 |
| n-propylbutanamide                                                      | C <sub>7</sub> H <sub>15</sub> NO                               | 129.200 | 0.05 | 27.118 |
| 2,3,4,6-Tetra-O-methylhexose                                            | C <sub>10</sub> H <sub>20</sub> O <sub>6</sub>                  | 236.262 | 0.05 | 27.211 |
| Hexadecanoic acid                                                       | C <sub>16</sub> H <sub>32</sub> O <sub>2</sub>                  | 256.424 | 0.08 | 33.218 |
| 9,12,15-Octadecatrienoic acid, (Z,Z,Z)-                                 | C <sub>18</sub> H <sub>30</sub> O <sub>2</sub>                  | 278.430 | 0.11 | 36.468 |
| Benzenesulfonamide, 4-methyl-N-(tetrahydro-2-oxo-3-furanyl)-            | C <sub>11</sub> H <sub>13</sub> NO <sub>4</sub> S               | 255.290 | 0.04 | 36.67  |
| Bicyclo[3.2.2]non-6-en-3-one                                            | C <sub>9</sub> H <sub>12</sub> O                                | 136.191 | 0.10 | 36.849 |
| 4-H-pyrazolo[3,4-D]pyrimidin-4-one, 1,5-dihydro                         | C <sub>5</sub> H <sub>4</sub> N <sub>4</sub> O                  | 136.111 | 0.09 | 36.938 |
| 9-Octadecenamide                                                        | C <sub>18</sub> H <sub>35</sub> NO                              | 281.477 | 0.07 | 40.19  |
| 3-(2-Phenylethyl)benzotrile                                             | C <sub>15</sub> H <sub>13</sub> N                               | 207.270 | 0.07 | 41.415 |
| 1H-Pyrazole-1-acetamide, 4-iodo-N-(phenylmethyl)-                       | C <sub>12</sub> H <sub>12</sub> IN <sub>3</sub> O               | 341.148 | 0.07 | 41.738 |
| 4,4-Dimethyl-7-oxoandrost-5-en-3-yl acetate                             | C <sub>23</sub> H <sub>34</sub> O <sub>3</sub>                  | 358.514 | 0.06 | 41.942 |
| Benzoic acid, 4-methoxy-3-(4-methoxycarbonylphenoxy)-, methyl ester     | C <sub>17</sub> H <sub>16</sub> O <sub>6</sub>                  | 316.305 | 0.17 | 42.978 |
| 3,20-Allopregnanedione                                                  | C <sub>21</sub> H <sub>32</sub> O <sub>2</sub>                  | 316.478 | 0.05 | 43.055 |
| 1,4-dihydroxy-2-[(hydroxyethyl)thio]anthraquinone                       | C <sub>16</sub> H <sub>12</sub> O <sub>5</sub> S                | 316.328 | 0.07 | 43.103 |
| <b>Methanol</b>                                                         |                                                                 |         |      |        |
| 3(2H)-Furanone, dihydro-2-methyl                                        | C <sub>5</sub> H <sub>8</sub> O <sub>2</sub>                    | 100.116 | 0.08 | 3.612  |
| Ethylamine                                                              | C <sub>2</sub> H <sub>7</sub> N                                 | 45.084  | 0.07 | 4.049  |
| 2-methylpropane                                                         | C <sub>4</sub> H <sub>10</sub>                                  | 58.122  | 0.16 | 4.602  |
| 1(2H)-pentalenone, hexahydro-4-methyl-5-methylene                       | C <sub>10</sub> H <sub>10</sub> O                               | 150.218 | 0.08 | 6.385  |
| N-Acetylenediamine                                                      | C <sub>4</sub> H <sub>10</sub> N <sub>2</sub> O                 | 102.135 | 0.03 | 6.938  |
| 3-Amino-2-oxazolidinone                                                 | C <sub>3</sub> H <sub>6</sub> N <sub>2</sub> O <sub>2</sub>     | 102.092 | 0.15 | 7.559  |
| N-Methyl-D-aspartic acid                                                | C <sub>5</sub> H <sub>9</sub> NO <sub>4</sub>                   | 147.129 | 0.24 | 7.822  |
| 1,3-dimethyl trisulfane                                                 | C <sub>2</sub> H <sub>6</sub> S <sub>3</sub>                    | 126.264 | 0.07 | 8.799  |
| N-Methylmorpholine                                                      | C <sub>5</sub> H <sub>11</sub> NO                               | 101.147 | 0.10 | 9.127  |
| 5-methyloxazolidine                                                     | C <sub>4</sub> H <sub>9</sub> NO                                | 87.120  | 0.07 | 12.477 |
| 2-Iodoethane                                                            | C <sub>2</sub> H <sub>5</sub> I                                 | 226.032 | 0.22 | 12.841 |

|                                                               |                                                                |         |      |        |
|---------------------------------------------------------------|----------------------------------------------------------------|---------|------|--------|
| Cyclopentasiloxane decamethyl                                 | C <sub>10</sub> H <sub>30</sub> O <sub>5</sub> Si <sub>5</sub> | 370.770 | 0.05 | 13.422 |
| 4H-Pyran-4-one, 2,3-dihydro-3,5-dihydroxy-6-methyl-           | C <sub>6</sub> H <sub>8</sub> O <sub>4</sub>                   | 144.125 | 0.27 | 14.684 |
| 1,2,4,5-Tetrazine, hexahydro-1,2,4,5-tetramethyl-             | C <sub>6</sub> H <sub>16</sub> N <sub>4</sub>                  | 144.218 | 0.49 | 15.963 |
| 2-Hexynoic acid                                               | C <sub>6</sub> H <sub>8</sub> O <sub>2</sub>                   | 112.127 | 0.51 | 17.495 |
| 1-Nitro-.beta.-d-arabinofuranose, tetraacetate                | C <sub>13</sub> H <sub>17</sub> NO <sub>11</sub>               | 363.274 | 0.07 | 18.092 |
| 2-Propenoic acid, 2-(acetylamino)-                            | C <sub>5</sub> H <sub>7</sub> NO <sub>3</sub>                  | 129.114 | 0.32 | 21.492 |
| 1-butanol, 2-amino                                            | C <sub>4</sub> H <sub>11</sub> NO                              | 89.136  | 0.37 | 22.948 |
| (5-Methoxy-2H-tetrazol-2-yl)acetic acid                       | C <sub>4</sub> H <sub>6</sub> N <sub>4</sub> O <sub>3</sub>    | 158.115 | 0.23 | 23.522 |
| Vinylpyrazine                                                 | C <sub>6</sub> H <sub>6</sub> N <sub>2</sub>                   | 106.125 | 0.17 | 25.649 |
| 2-Propanone, 1-(1,3-dioxolan-2-yl)-                           | C <sub>6</sub> H <sub>10</sub> O <sub>3</sub>                  | 130.142 | 0.66 | 27.248 |
| 3-Hydroxy-N,N-dimethylpropanamide                             | C <sub>5</sub> H <sub>11</sub> NO <sub>2</sub>                 | 117.146 | 0.29 | 28.386 |
| Hexadecanoic acid                                             | C <sub>16</sub> H <sub>32</sub> O <sub>2</sub>                 | 256.424 | 0.18 | 33.234 |
| erythro-4-Hydroxyarginine lactone                             | C <sub>7</sub> H <sub>14</sub> N <sub>4</sub> O <sub>2</sub>   | 186.212 | 0.18 | 36.474 |
| 4H-Pyrazolo[3,4-d]pyrimidin-4-one, 1,5-dihydro-               | C <sub>5</sub> H <sub>4</sub> N <sub>4</sub> O                 | 136.111 | 0.28 | 37.191 |
| 9-Octadecenamide                                              | C <sub>18</sub> H <sub>35</sub> NO                             | 281.477 | 0.13 | 40.196 |
| Benzonitrile, m-phenethyl-                                    | C <sub>15</sub> H <sub>13</sub> N                              | 207.270 | 0.11 | 41.417 |
| Erucylamide                                                   | C <sub>22</sub> H <sub>43</sub> NO                             | 337.583 | 0.16 | 46.412 |
| 1,1,3,3,5,5,7,7,9,9,11,11,13,13-tetradecamethyl-heptasiloxane | C <sub>14</sub> H <sub>44</sub> O <sub>6</sub> Si <sub>7</sub> | 505.094 | 0.19 | 47.154 |
| <b>Dichloromethane</b>                                        |                                                                |         |      |        |
| Trichloromethane                                              | CHCl <sub>3</sub>                                              | 119.378 | 0.02 | 3.758  |
| Methyl dichloroacetate                                        | C <sub>3</sub> H <sub>4</sub> Cl <sub>2</sub> O <sub>2</sub>   | 142.969 | 0.03 | 4.756  |
| Isobutylmethylmethanol                                        | C <sub>6</sub> H <sub>14</sub> O                               | 102.175 | 0.03 | 4.828  |
| Ethyl dichloroacetate                                         | C <sub>4</sub> H <sub>6</sub> Cl <sub>2</sub> O <sub>2</sub>   | 156.995 | 0.03 | 5.08   |
| 1,1-dimethylcyclopropane                                      | C <sub>5</sub> H <sub>10</sub>                                 | 70.133  | 0.03 | 5.346  |
| Pyrrolidine, 1-[8-(3-octyloxiranyl)-1-oxooctyl]-              | C <sub>22</sub> H <sub>41</sub> NO <sub>2</sub>                | 351.566 | 0.05 | 7.132  |
| Diisopropylphosphine                                          | C <sub>6</sub> H <sub>15</sub> P                               | 118.157 | 0.04 | 8.037  |
| n-Decane                                                      | C <sub>10</sub> H <sub>22</sub>                                | 142.282 | 0.03 | 9.556  |
| 3,3-Dimethylhexane                                            | C <sub>8</sub> H <sub>18</sub>                                 | 114.229 | 0.03 | 9.863  |
| 4-methyloctane                                                | C <sub>9</sub> H <sub>20</sub>                                 | 128.255 | 0.03 | 11.892 |
| Dodecane                                                      | C <sub>12</sub> H <sub>26</sub>                                | 170.335 | 0.04 | 15.379 |
| Benzene, 1,4-bis(1,1-dimethylethyl)-                          | C <sub>14</sub> H <sub>22</sub>                                | 190.324 | 0.04 | 16.74  |
| 2-Hexanone, 3-methyl-4-methylene-                             | C <sub>8</sub> H <sub>14</sub> O                               | 126.196 | 0.04 | 18.118 |
| 2,3-Dimethyl-3-heptene, (Z)-                                  | C <sub>9</sub> H <sub>18</sub>                                 | 126.239 | 0.04 | 18.35  |
| 2-Pentenal, (Z)-                                              | C <sub>5</sub> H <sub>8</sub> O                                | 84.116  | 0.03 | 18.576 |
| 2,3-dimethylundecane                                          | C <sub>13</sub> H <sub>28</sub>                                | 184.361 | 0.03 | 22.11  |
| Oxalic acid, isohexylneopentyl ester                          | C <sub>13</sub> H <sub>24</sub> O <sub>4</sub>                 | 244.327 | 0.04 | 22.554 |

|                                                                    |                                                               |         |       |        |
|--------------------------------------------------------------------|---------------------------------------------------------------|---------|-------|--------|
| N-Hydroxyphthalimide                                               | C <sub>8</sub> H <sub>5</sub> NO <sub>3</sub>                 | 163.130 | 0.02  | 23.023 |
| Phenol, 2,4-bis(1,1-dimethylethyl)-                                | C <sub>14</sub> H <sub>22</sub> O                             | 206.324 | 0.05  | 23.521 |
| 3-Hexene, 2,3-dimethyl-                                            | C <sub>8</sub> H <sub>16</sub>                                | 112.213 | 0.05  | 24.225 |
| 2,4-Ditert-butyl-6-nitrophenol                                     | C <sub>14</sub> H <sub>21</sub> NO <sub>3</sub>               | 251.321 | 0.035 | 27.313 |
| Phenethylene                                                       | C <sub>8</sub> H <sub>8</sub>                                 | 104.149 | 0.07  | 28.949 |
| 1-Docosene                                                         | C <sub>22</sub> H <sub>44</sub>                               | 308.585 | 0.04  | 35.444 |
| Carbonic acid, isobutyl pentadecyl ester                           | C <sub>20</sub> H <sub>40</sub> O <sub>3</sub>                | 328.530 | 0.05  | 39.146 |
| 9-octadecenamide                                                   | C <sub>18</sub> H <sub>35</sub> NO                            | 281.477 | 0.05  | 40.214 |
| 3-(2-Phenylethyl)benzotrile                                        | C <sub>15</sub> H <sub>13</sub> N                             | 207.270 | 0.04  | 41.419 |
| Hexadecenitrile                                                    | C <sub>16</sub> H <sub>29</sub> N                             | 235.408 | 0.04  | 42.195 |
| cis-4-Ethoxy-b-methyl-b-nitrostyrene                               | C <sub>11</sub> H <sub>13</sub> NO <sub>3</sub>               | 207.226 | 0.04  | 42.779 |
| 5-Methoxythiazole                                                  | C <sub>4</sub> H <sub>5</sub> NOS                             | 115.154 | 0.05  | 44.047 |
| 2-Benzyl-2-methyl-3-oxopropionic acid, ethyl ester                 | C <sub>13</sub> H <sub>16</sub> O <sub>3</sub>                | 220.264 | 0.02  | 44.689 |
| 1-Benzyl-2-hydroxymethyl-cis-3-(p-ethoxyphenylcarbamoyl)aziridine  | C <sub>18</sub> H <sub>20</sub> N <sub>2</sub> O <sub>3</sub> | 312.363 | 0.03  | 44.704 |
| Erucylamide                                                        | C <sub>22</sub> H <sub>43</sub> NO                            | 337.583 | 0.06  | 46.417 |
| L-Ascorbic acid 6-palmitate                                        | C <sub>22</sub> H <sub>38</sub> O <sub>7</sub>                | 414.533 | 0.01  | 47.126 |
| 2,2-Dimethylpropanoic acid, 2,6-dimethylnon-1-en-3-yn-5-yl ester   | C <sub>16</sub> H <sub>26</sub> O <sub>2</sub>                | 250.376 | 0.03  | 47.164 |
| <b>Toluene</b>                                                     |                                                               |         |       |        |
| Trichloromethane                                                   | CHCl <sub>3</sub>                                             | 119.378 | 0.02  | 3.776  |
| 1,3,5-cycloheptatriene                                             | C <sub>7</sub> H <sub>8</sub>                                 | 92.138  | 0.10  | 4.152  |
| Methyl dichloroacetate                                             | C <sub>3</sub> H <sub>4</sub> Cl <sub>2</sub> O <sub>2</sub>  | 142.969 | 0.03  | 4.763  |
| 4-methyl-2-pentanol                                                | C <sub>6</sub> H <sub>14</sub> O                              | 102.175 | 0.03  | 4.84   |
| 2,2,3,3,5,6,6-Heptamethylheptane                                   | C <sub>14</sub> H <sub>30</sub>                               | 198.388 | 0.03  | 5.222  |
| 1,3-Dimethylbenzene                                                | C <sub>8</sub> H <sub>10</sub>                                | 106.165 | 0.06  | 6.109  |
| 1-chloro-3-hydroxypropane                                          | C <sub>3</sub> H <sub>7</sub> ClO                             | 94.540  | 0.04  | 8.038  |
| Dodecane                                                           | C <sub>12</sub> H <sub>26</sub>                               | 170.335 | 0.04  | 15.377 |
| 1,3-Di-tert-butylbenzene                                           | C <sub>14</sub> H <sub>22</sub>                               | 190.324 | 0.04  | 16.741 |
| 2-Decene, 7-methyl-, (Z)-                                          | C <sub>11</sub> H <sub>22</sub>                               | 154.292 | 0.04  | 18.117 |
| 2-Methyl-3-ethyl-1-pentene                                         | C <sub>8</sub> H <sub>16</sub>                                | 112.213 | 0.04  | 18.352 |
| 2,4-Di-tert-butylphenol                                            | C <sub>14</sub> H <sub>22</sub> O                             | 206.324 | 0.05  | 23.517 |
| 2,4-Ditert-butyl-6-nitrophenol                                     | C <sub>14</sub> H <sub>21</sub> NO <sub>3</sub>               | 251.321 | 0.04  | 27.314 |
| Phenethylene                                                       | C <sub>8</sub> H <sub>8</sub>                                 | 104.149 | 0.08  | 28.943 |
| 1-Hydroxyheptadecane                                               | C <sub>17</sub> H <sub>36</sub> O                             | 256.467 | 0.05  | 35.442 |
| 9-octadecenamide                                                   | C <sub>18</sub> H <sub>35</sub> NO                            | 281.477 | 0.07  | 40.202 |
| 2-methyl-3-phenyl-1H-indole                                        | C <sub>15</sub> H <sub>13</sub> N                             | 207.270 | 0.05  | 43.292 |
| 1-Benzyl-2-hydroxymethyl-cis-3-(p-methoxyphenylcarbamoyl)aziridine | C <sub>18</sub> H <sub>20</sub> N <sub>2</sub> O <sub>3</sub> | 312.363 | 0.06  | 44.698 |

|                                                                  |                                                               |         |      |        |
|------------------------------------------------------------------|---------------------------------------------------------------|---------|------|--------|
| Erucylamide                                                      | C <sub>22</sub> H <sub>43</sub> NO                            | 337.583 | 0.07 | 46.413 |
| Fluocortolone-21-pivalate                                        | C <sub>27</sub> H <sub>37</sub> FO <sub>5</sub>               | 460.578 | 0.12 | 79.91  |
| <b>Ether</b>                                                     |                                                               |         |      |        |
| Trichloromethane                                                 | CHCl <sub>3</sub>                                             | 119.378 | 0.02 | 3.432  |
| Methyl dichloroacetate                                           | C <sub>3</sub> H <sub>4</sub> Cl <sub>2</sub> O <sub>2</sub>  | 142.969 | 0.03 | 4.748  |
| 2-pentanol, 4-methyl                                             | C <sub>6</sub> H <sub>14</sub> O                              | 102.175 | 0.03 | 4.823  |
| Ethyl dichloroacetate                                            | C <sub>4</sub> H <sub>6</sub> Cl <sub>2</sub> O <sub>2</sub>  | 156.995 | 0.04 | 5.073  |
| 2-butene, 2-methyl                                               | C <sub>5</sub> H <sub>9</sub>                                 | 69.126  | 0.03 | 5.341  |
| Thioimidodicarbonicdiamide                                       | C <sub>2</sub> H <sub>5</sub> N <sub>3</sub> S <sub>2</sub>   | 135.211 | 0.04 | 8.033  |
| Decane                                                           | C <sub>10</sub> H <sub>22</sub>                               | 142.282 | 0.06 | 9.553  |
| 4-Methyldecane                                                   | C <sub>11</sub> H <sub>24</sub>                               | 156.308 | 0.04 | 9.739  |
| 1-hydroxytetradecane                                             | C <sub>14</sub> H <sub>30</sub> O                             | 214.387 | 0.04 | 11.768 |
| Dodecane                                                         | C <sub>12</sub> H <sub>26</sub>                               | 170.335 | 0.04 | 15.377 |
| 1,4-Di-tert-butylbenzene                                         | C <sub>14</sub> H <sub>22</sub>                               | 190.324 | 0.04 | 16.743 |
| 4-Methyloctane                                                   | C <sub>9</sub> H <sub>20</sub>                                | 128.255 | 0.05 | 18.117 |
| 1,1,3-Trimethylcyclopentane                                      | C <sub>8</sub> H <sub>16</sub>                                | 112.213 | 0.04 | 18.352 |
| 2-Ethyl-4-pentenal                                               | C <sub>7</sub> H <sub>12</sub> O                              | 112.170 | 0.04 | 18.573 |
| Henicosane                                                       | C <sub>21</sub> H <sub>44</sub>                               | 296.574 | 0.06 | 22.556 |
| 2,4-Di-tert-butylphenol                                          | C <sub>14</sub> H <sub>22</sub> O                             | 206.324 | 0.05 | 23.517 |
| 2,4-Ditert-butyl-6-nitrophenol                                   | C <sub>14</sub> H <sub>21</sub> NO <sub>3</sub>               | 251.321 | 0.04 | 27.314 |
| 9-octadecenamide                                                 | C <sub>18</sub> H <sub>35</sub> NO                            | 281.477 | 0.06 | 40.208 |
| 3-(2-Phenylethyl)benzotrile                                      | C <sub>15</sub> H <sub>13</sub> N                             | 207.270 | 0.05 | 41.419 |
| 1,2-dipropylacenaphthylene                                       | C <sub>18</sub> H <sub>20</sub>                               | 236.351 | 0.05 | 43.014 |
| Acetamide, N-(4-cyanomethylphenyl)-2-O-tolyloxy-                 | C <sub>17</sub> H <sub>16</sub> N <sub>2</sub> O <sub>2</sub> | 280.321 | 0.07 | 44.048 |
| Erucylamide                                                      | C <sub>22</sub> H <sub>43</sub> NO                            | 337.583 | 0.07 | 46.412 |
| 2,2-Dimethylpropanoic acid, 2,6-dimethylnon-1-en-3-yn-5-yl ester | C <sub>16</sub> H <sub>26</sub> O <sub>2</sub>                | 250.376 | 0.09 | 47.185 |
| 2,2-Dimethyl-N-(4-methylphenyl)propanamide                       | C <sub>12</sub> H <sub>17</sub> NO                            | 191.270 | 0.17 | 49.829 |



### Supporting Information S3.

GC-MS chromatogram of WC ethanol extract

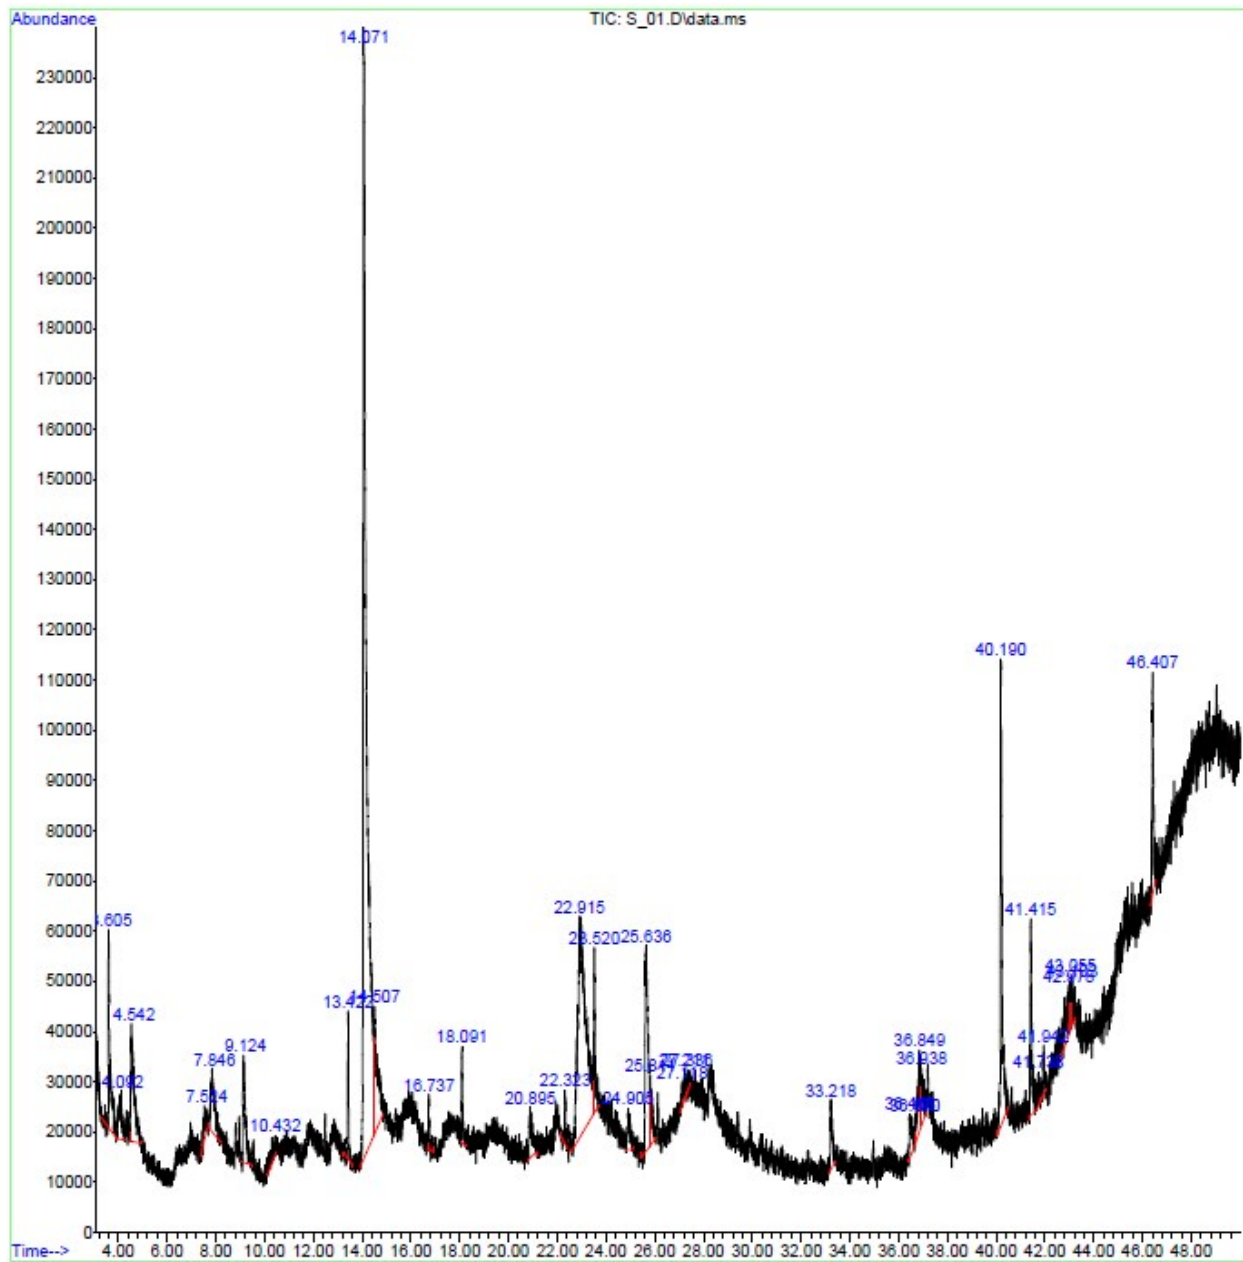

GC-MS chromatogram of WC methanol extract

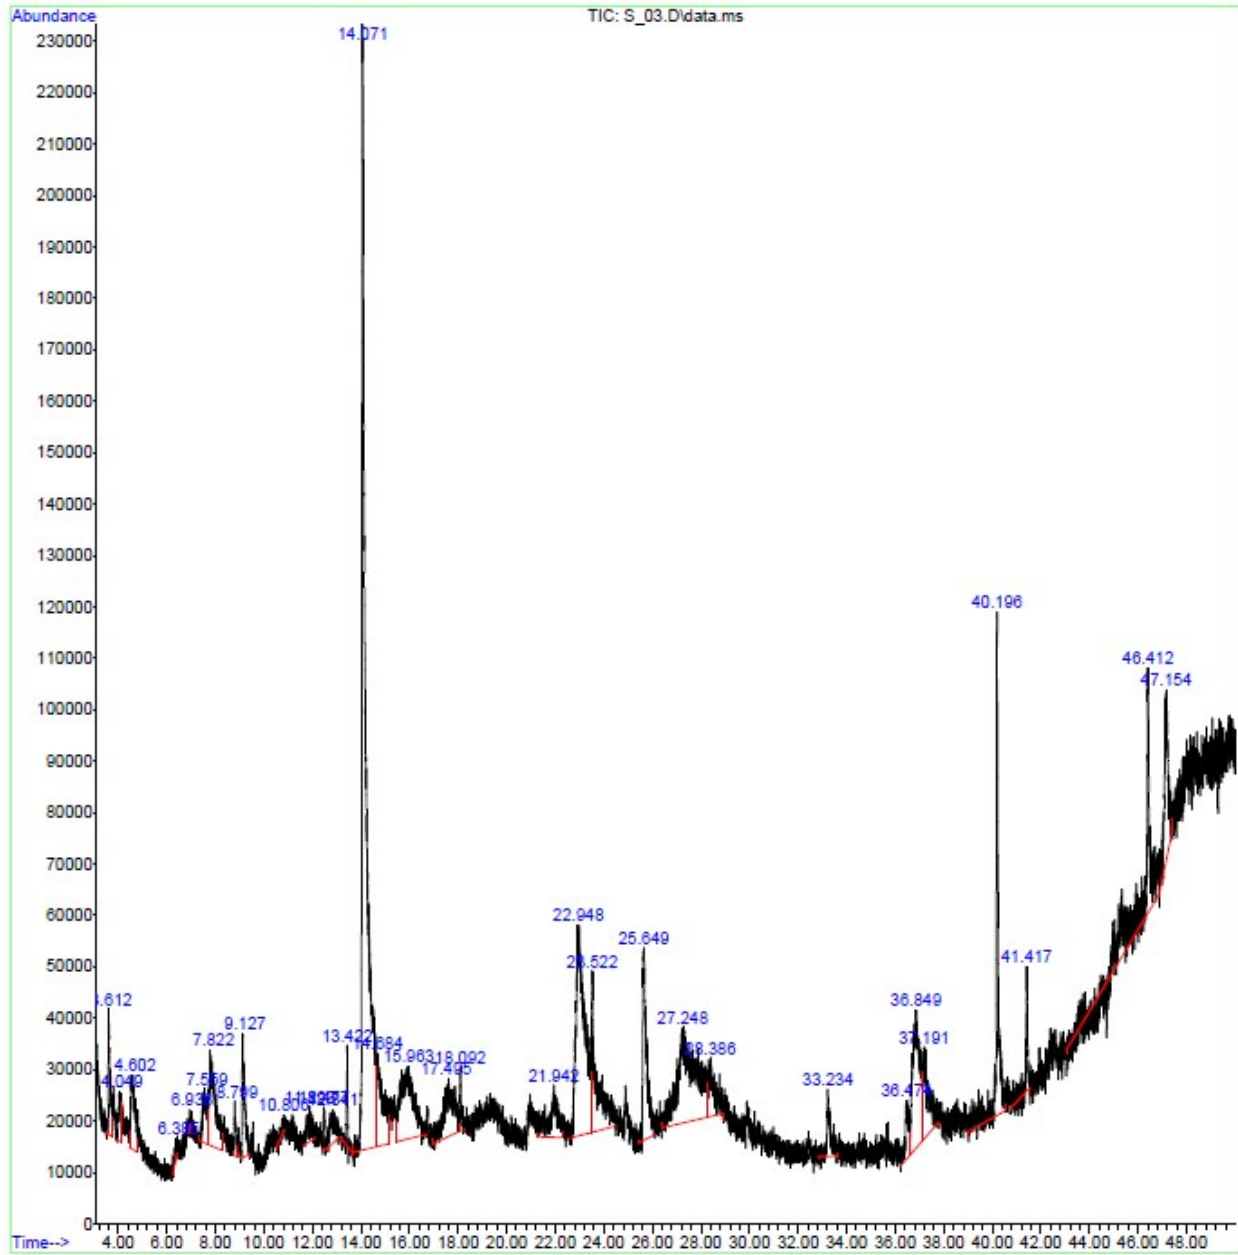

GC-MS chromatogram of WC dichloromethane extract

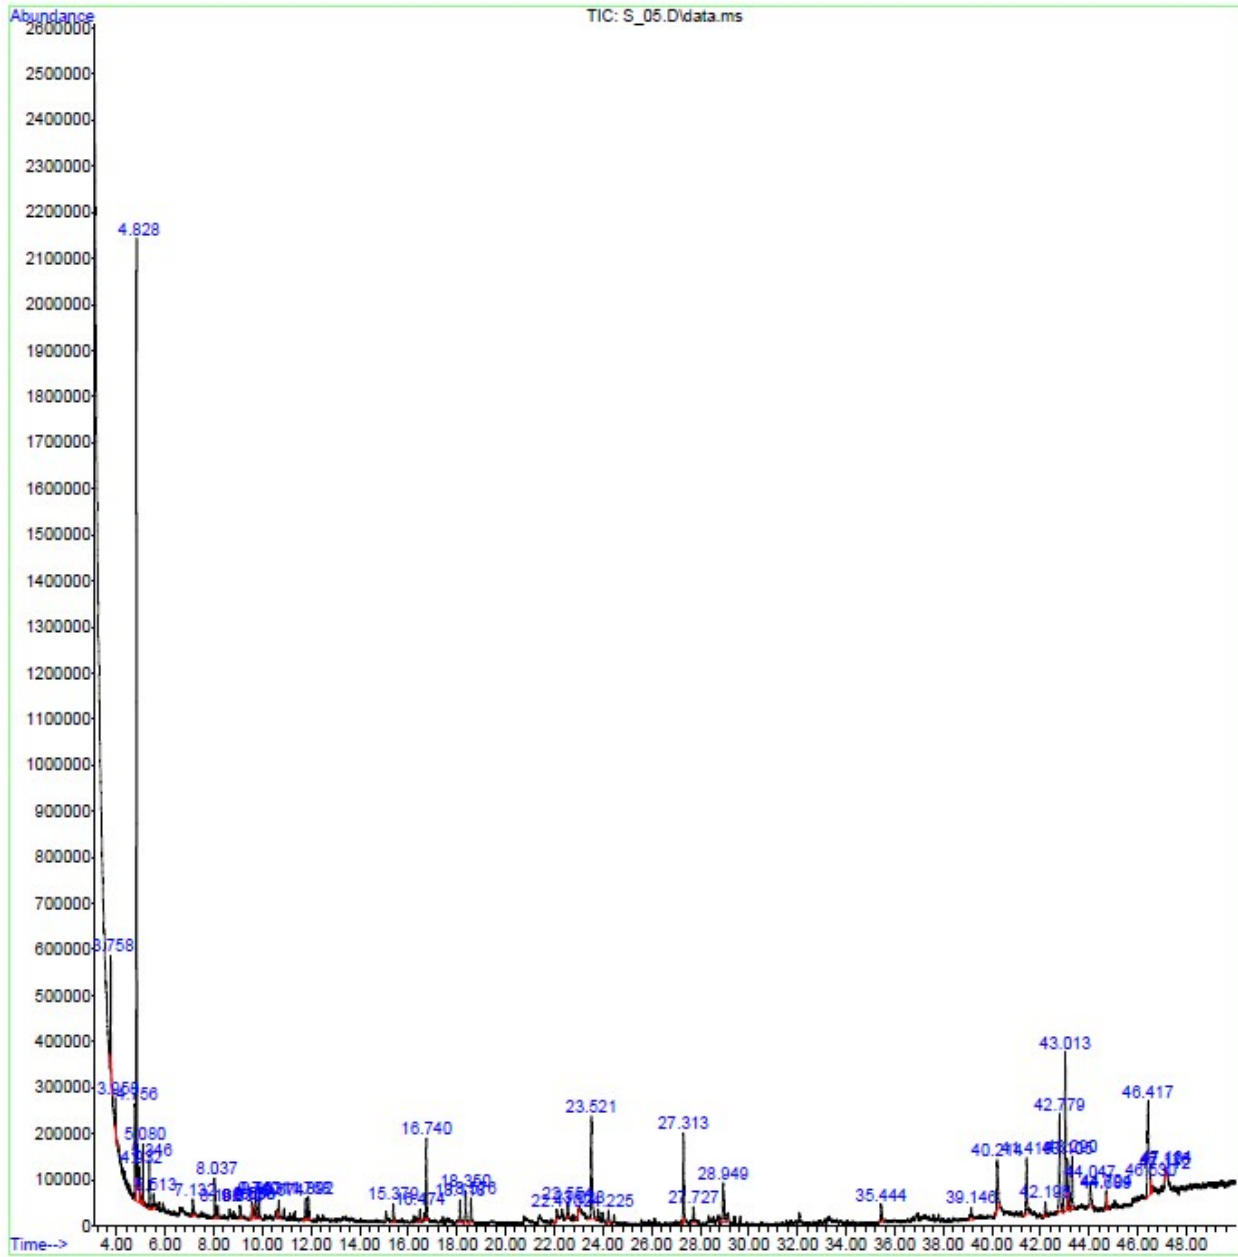

# GC-MS chromatogram of WC toluene extract

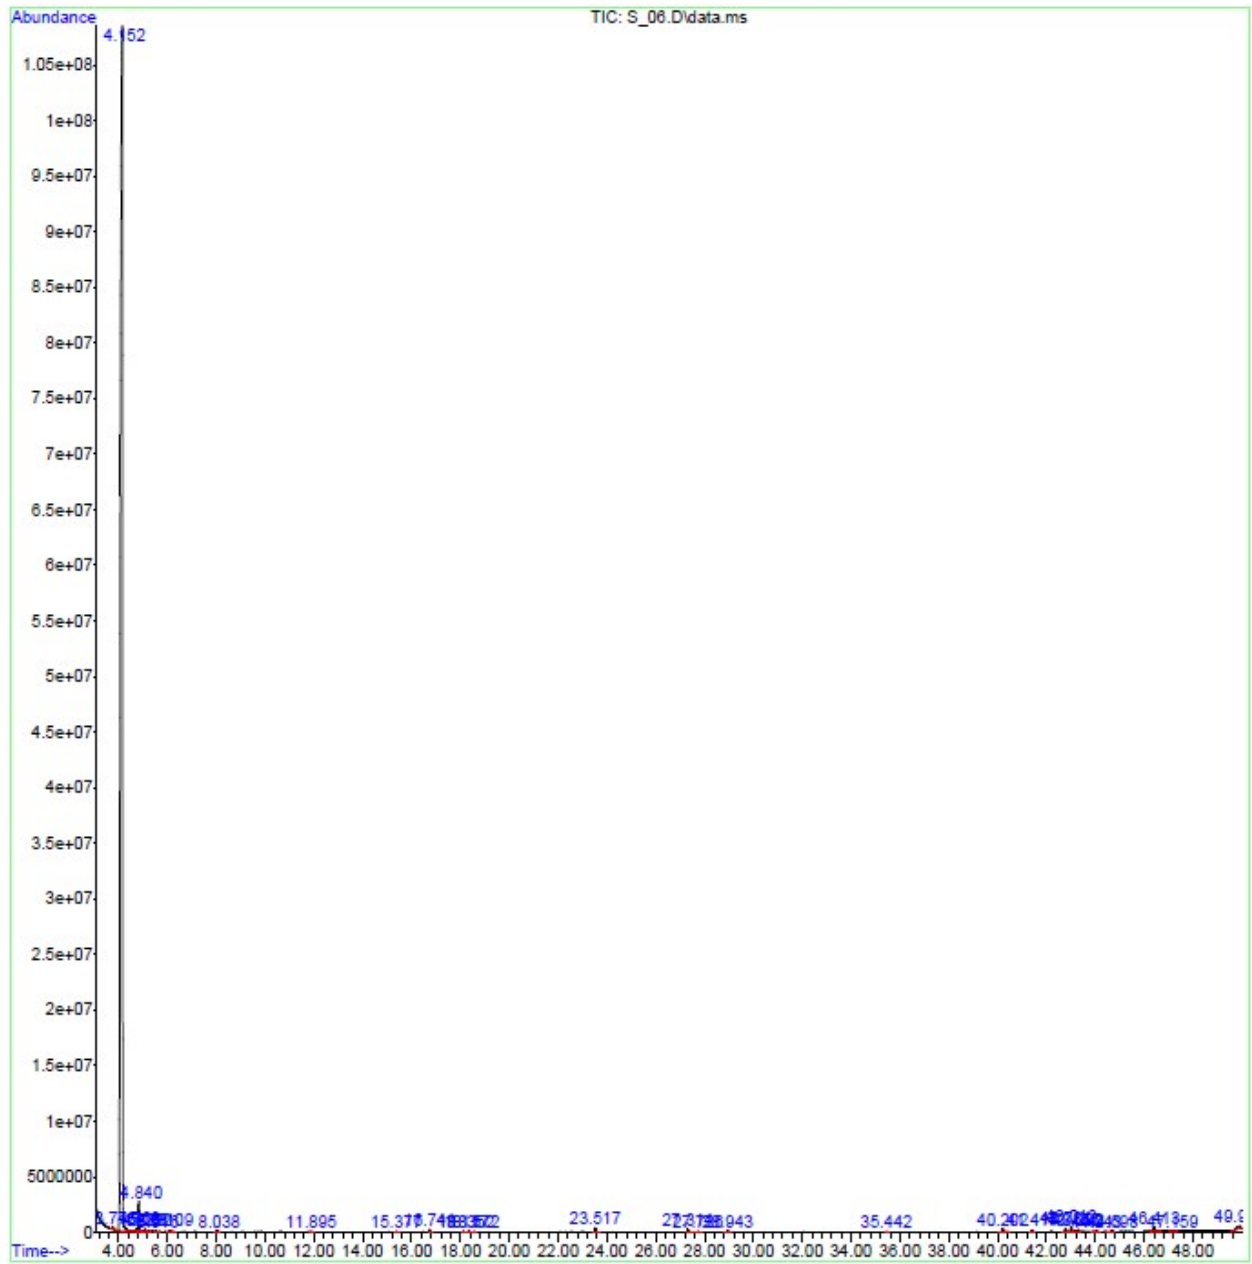

GC-MS chromatogram of WC ether extract

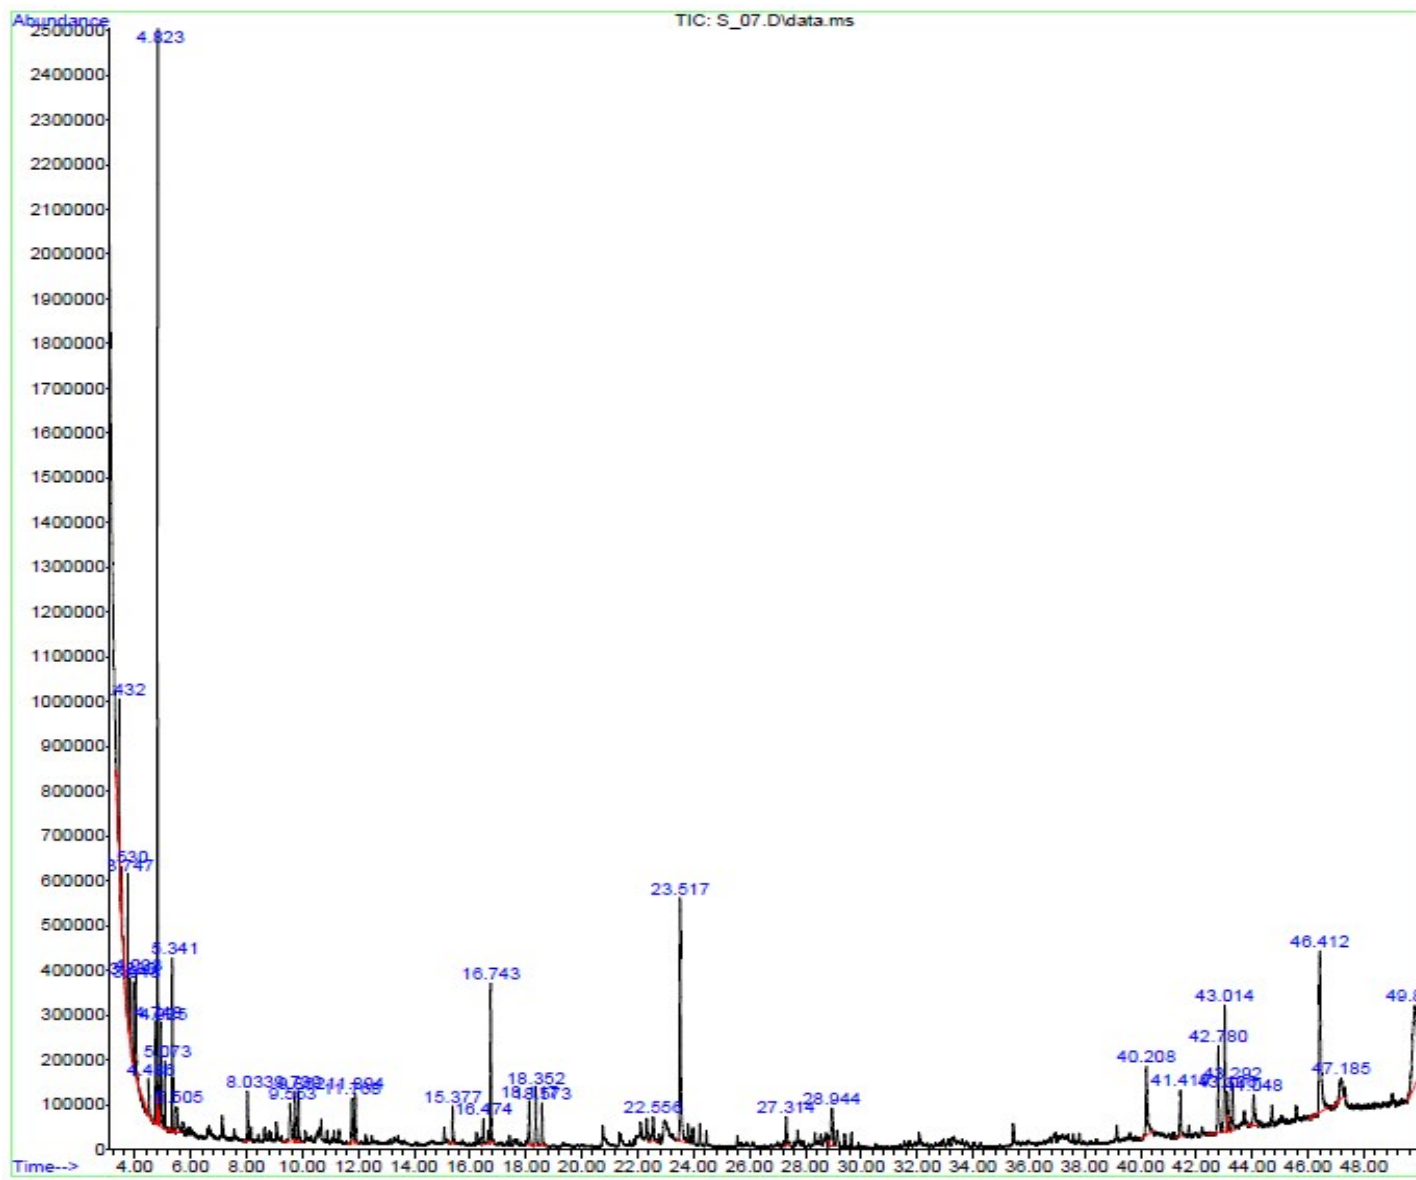

Supplement: d0ra06727j1.pdf [file d0ra06727j1.pdf]
